# Supplementary material
Source: HighWire-hosted journal article supplement (https://bmjophth.bmj.com/content/8/1/e001290)
Supplement: inline-supplementary-material-1 [file inline-supplementary-material-1.pdf]

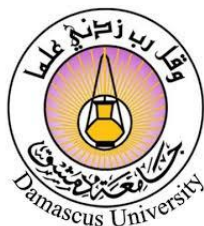

## Damascus university

### Faculty of medicine

**The following form aims to collect data about awareness and attitudes of donation cornea after death**

|           |                                      |                                  |
|-----------|--------------------------------------|----------------------------------|
| Gender    | Female <input type="radio"/>         | Male <input type="radio"/>       |
| Age range | 30-18 <input type="radio"/>          | 50-30 <input type="radio"/>      |
|           | 70< <input type="radio"/>            | 70-50 <input type="radio"/>      |
| Education | <input type="radio"/> primary school | university <input type="radio"/> |
|           | <input type="radio"/> high school    |                                  |

|                                                                 |                     |                                                   |                                                                       |
|-----------------------------------------------------------------|---------------------|---------------------------------------------------|-----------------------------------------------------------------------|
| Have you ever heard of cornea donation?                         | Yes                 | No                                                |                                                                       |
| Would you consent to being a cornea donor after death?          | Yes                 | No                                                |                                                                       |
| Do you encourage cornea donation?                               | yes                 | No                                                |                                                                       |
| Where does your knowledge of corneal transplantation come from? | university<br>Media | I, or someone around me, had a corneal transplant | this is the first time I encounter this issue from the current survey |

|                                                                                                                          |                                               |                                                            |                                                      |                                                           |  |
|--------------------------------------------------------------------------------------------------------------------------|-----------------------------------------------|------------------------------------------------------------|------------------------------------------------------|-----------------------------------------------------------|--|
| <b>Do you agree to donate one of your organs after death?</b>                                                            | Yes                                           |                                                            |                                                      | No                                                        |  |
| <b>Do you agree to donate your cornea after death?</b>                                                                   | yes                                           |                                                            |                                                      | No                                                        |  |
| For what reason would you refuse to be a cornea donor?                                                                   | due to the aesthetics of the body after death | because of my relatives' views on the subject              | due to a lack of knowledge about corneal transplants | not applicable                                            |  |
|                                                                                                                          |                                               |                                                            |                                                      | religious issues                                          |  |
| If you agree to donate your cornea, what is the reason that motivates you to do so (more than one option can be chosen)? | it will not harm me<br>Why not?               | Financial return                                           | Religious beliefs, My religion encourages donation   | Pure intention to help the needy and restore sight to him |  |
| Would you give consent to have a cornea collected from a close relative after his / her death?                           | Yes                                           |                                                            |                                                      | No                                                        |  |
| Why would you not consent to a cornea being collected from a close relative after his / her death?                       | because of my relatives' views on the subject | due to the aesthetics of the body after death <sup>3</sup> | religious issues                                     | due to a lack of knowledge about corneal transplants      |  |
| Would you register as a potential cornea donor, if there was an appropriate registry?                                    | Yes                                           |                                                            |                                                      | No                                                        |  |
| At what time after death should the corneas be collected?                                                                | up to 2 h                                     | up to 6 h                                                  | up to 24 h                                           | don't know                                                |  |

|                                                                                                                                         |     |    |
|-----------------------------------------------------------------------------------------------------------------------------------------|-----|----|
| If you were exposed to a disease whose only treatment is a corneal transplant, will you accept a cornea transplant from a donor?        | Yes | No |
| Would you agree to donate your cornea if you were in a developed country with strict legislation regulating organ donation?             | Yes | No |
| Would you agree to register yourself as an organ donor if you knew that you would be a beneficiary in the event of an organ transplant? | Yes | No |
